# Supplementary material
Source: HighWire-hosted journal article supplement (https://bmjopen.bmj.com/content/12/11/e062177)
Supplement: inline-supplementary-material-1 [file inline-supplementary-material-1.pdf]

**ABOUT YOU (optional)**

It is important that we know a little bit about you so that we can ensure we have collected the views from a wide range of people with different experiences.

Do YOU have or have YOU had an Elbow problem? Yes ☐ No ☐

If YES, at what age did your elbow problem start?

☐ <16 ☐ 16-29 ☐ 30-49 ☐ 50-69 ☐ 70+

Which describes you?

☐ Patient

☐ Carer

☐ Family/ Friend

☐ Healthcare Professional, please specify \_\_\_\_\_

Are you: ☐ Male ☐ Female ☐ Prefer to self describe ☐ Prefer not to say?

Age: ☐ <16 ☐ 16-29 ☐ 30-49 ☐ 50-69 ☐ 70+ ☐ Prefer not to say

What is your post code, first 3 or 4 characters only ☐ ☐ ☐ ☐ ?

What is your ethnicity?

☐ White ☐ Asian/Asian British ☐ Black/Caribbean/Black British

☐ Arab ☐ Mixed/multiple ethnic groups ☐ Prefer not to say

Other ethnic group ☐ please describe \_\_\_\_\_

**THANK YOU, please consider** completing this survey. Please hand it back to a staff member or return to **James Lind Alliance PSP Coordinator, Elaine James, [elaine.james@uhl-tr.nhs.uk](mailto:elaine.james@uhl-tr.nhs.uk)** using the envelope provided.

If you require assistance completing this survey, please do not hesitate to contact us:

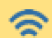

<https://www.bess.org.uk/index.php/elbowJLA>

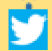

@ElbowPSP

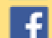

[www.facebook.com/ElbowPSP/](https://www.facebook.com/ElbowPSP/)

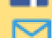

[elbowjla@leicester.ac.uk](mailto:elbowjla@leicester.ac.uk)

# ELBOW CONDITIONS

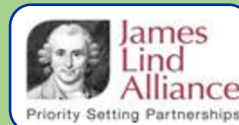

Can you help us decide the big questions that should be answered by research?

Have you had or cared for somebody who had problems with their elbow that has required help from a healthcare professional?

OR

Are you a healthcare professional who is involved in the treating patients with elbow conditions?

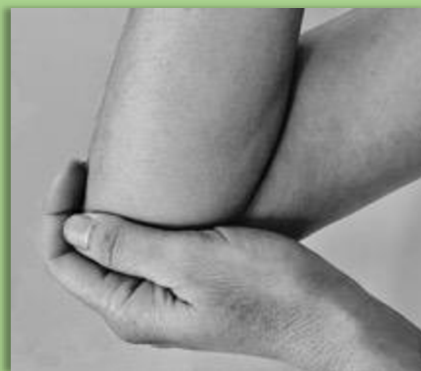

Please complete the sections on the next page to suggest questions about treatment and recovery in elbow conditions that could be answered by research in the future.

To be completed by Patients, Carers, Family/Friends or Health Care Professionals

To find out more about this project visit  
<https://www.bess.org.uk/index.php/elbowJLA>

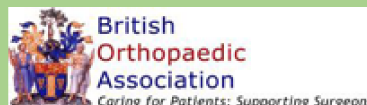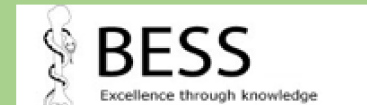

**Who are we?**

We are a group of patients, clinicians and researchers who want to help improve the care and quality of life of patients who suffer from elbow joint conditions/ disorders/ diseases.

This is a collaboration between the British Elbow and Shoulder Society, British Orthopaedic Association, Leicester Shoulder Elbow Unit Charity and the James Lind Alliance.

**What are the elbow conditions?**

Examples of the elbow conditions include:

- Elbow Osteoarthritis
- Inflammatory arthritis,
- Tendonitis (like Tennis Elbow, Golfers Elbow),
- Biceps or Triceps tendonitis
- Elbow Stiffness,
- Ulnar Nerve Problems,
- Chronic Elbow Instability,
- Biceps tendon rupture
- Congenital elbow conditions or
- Elbow Fractures or Dislocations,
- Diagnosis referral pathways or
- Long term outcomes

**Why do we need your help?**

We are asking:

- patients,
  - their carers/relatives and
  - healthcare professionals
- about the questions they feel need answering the most, in order to improve care and recovery.

We want your views to guide future research and for you to have a voice in shaping the advances in the management of such elbow conditions for future generations.

**What will we do with your survey results?**

We will collate your response with everyone else's. We then ask patients, their relatives/carers and healthcare professionals to rank which of these they think are the most important research priorities. This enables those funding research to know which questions are the most important to be answered.

**Want to contact us?**

If you would like to take part in this project or would want further information, **please email:**  
**elaine.james@uhl-tr.nhs.uk**

**THE SURVEY** – Please write in the boxes below any questions you have about elbow conditions and/or what is important to you.

Questions may be about treatment, recovery, the way care was delivered, diagnostic pathways and long-term recovery.

***What questions about elbow conditions would you like to be answered by research?***

*Please feel free to add as many questions as you like.*

*Is there anything else you would like to tell us? (e.g. any personal experiences about elbow conditions that you would like to share)*

**YOU CAN COMPLETE THIS SURVEY ONLINE AT**

<https://leicester.onlinesurveys.ac.uk/elbowpwp>

By participating in this survey you give us, and partner organisations, permission to publish your answers for the Priority Setting Partnership, but the information you give will be anonymised (so your name will not be published and you will not be identifiable from what you have told us).
