# Supplementary material
Source: HighWire-hosted journal article supplement (https://bmjopen.bmj.com/content/12/11/e062177)
Supplement: inline-supplementary-material-2 [file inline-supplementary-material-2.pdf]

| Rank | Question                                                                                                                                                    |
|------|-------------------------------------------------------------------------------------------------------------------------------------------------------------|
| 1    | What is the best treatment (surgery or conservative management) for elbow arthritis in young /active patients?                                              |
| 2    | Which factors affect the outcome and longevity of elbow replacements?                                                                                       |
| 3    | What is the best rehabilitation programme for prevention of stiffness following elbow trauma or surgery?                                                    |
| 4    | What is the best treatment approach (surgery or without surgery) in management of early or persistent elbow tendinopathies (such as tennis/golfer's elbow)? |
| 5    | Comparing non-surgical treatments (such as medications, therapy interventions, injections etc), which is most effective in elbow arthritis?                 |
| 6    | What is the outcome of surgery (including open or key-hole surgery) in the management of elbow arthritis?                                                   |
| 7    | What is the best treatment (including surgical and non-surgical) for non-arthritic elbow stiffness?                                                         |
| 8    | How to manage pain (early/persistent) in common elbow conditions?                                                                                           |
| 9    | What and when is the best treatment option for distal biceps tendon ruptures (surgical or non-surgical)?                                                    |
| 10   | What are the best pre and post-op rehabilitation regimens for total elbow replacements, including advice on long term physical restrictions?                |

|           |                                                                                                                                                                                     |
|-----------|-------------------------------------------------------------------------------------------------------------------------------------------------------------------------------------|
| <b>11</b> | In patients with partial thickness distal biceps ruptures, does surgical or non-surgical treatment lead to better outcomes?                                                         |
| <b>12</b> | What is the best way to manage a radial nerve injury following humeral fracture or surgery?                                                                                         |
| <b>13</b> | What are the non-surgical options for managing cubital tunnel syndrome and what is their effectiveness?                                                                             |
| <b>14</b> | What is the role of non-surgical treatments (including medications, injections) in elbow tendinopathies (e.g. tennis/golfer elbows)?                                                |
| <b>15</b> | What is the effectiveness of surgery for elbow tendinopathies (e.g. tennis/golfer's elbows) compared to nonsurgical management?                                                     |
| <b>16</b> | Which rehabilitation programmes (such as splinting, exercise regimen, physical therapy) are most effective in the management of elbow tendinopathies (e.g. tennis / golfer elbows)? |
| <b>17</b> | Does elbow tendinopathy (e.g. golfer's and tennis elbow) get better by itself?                                                                                                      |
| <b>18</b> | Can elbow tendinopathies (e.g. tennis/golfer's elbows) be effectively self-managed?                                                                                                 |
